# Supplementary material
Source: PubMed Central journal article supplement (PMC10187491)
Supplement: jamanetwopen-e2252689-s001.pdf [file jamanetwopen-e2252689-s001.pdf]

## Supplemental Online Content

Elser H, Humphreys K, Kiang MV, et al. State cannabis legalization and psychosis-related health care utilization. *JAMA Netw Open*. 2023;6(1):e2252689.  
doi:10.1001/jamanetworkopen.2022.52689

**eAppendix 1.** Preregistration

**eAppendix 2.** Callaway and Sant'Anna Estimator

**eTable 1.** Diagnostic Codes From the International Classification of Diseases, Ninth and Tenth Revision Used to Identify Psychosis

**eTable 2.** Typical and Atypical Antipsychotics

**eTable 3.** Distribution of State Characteristics Overall and by Policy Type, 2003 to 2017

**eTable 4.** Crude Rates for Psychosis-Related Diagnoses and Prescriptions, 2003 to 2017

**eTable 5.** Adjusted Rate Ratios for the Association Between State Cannabis Policy Level and Psychosis-Related Diagnoses and Prescribed Antipsychotics, 2003 to 2017

**eTable 6.** Adjusted Rate Ratios for the Association Between State Cannabis Policy Level and Psychosis-Related Diagnoses and Prescribed Antipsychotics by Sex, 2003 to 2017

**eTable 7.** Adjusted Rate Ratios for the Association Between State Cannabis Policy Level and Psychosis-Related Diagnoses and Prescribed Antipsychotics by Age Group, 2003 to 2017

**eTable 8.** Adjusted Rate Ratios for the Association Between State Cannabis Policy Level and Psychosis-Related Diagnoses and Prescribed Antipsychotics by Age Group, 2003 to 2017

**eTable 9.** Adjusted Rate Ratios for the Association Between State Cannabis Policy Level and Psychosis-Related Diagnoses and Prescribed Antipsychotics by Race and Ethnicity, 2003 to 2017

**eTable 10.** Adjusted Rate Ratios for Psychosis-Related Diagnoses by Subtype, 2003 to 2017

**eTable 11.** Adjusted Rate Ratios for the Association Between State Cannabis Policy Level for First-Generation and Second-Generation Antipsychotics, 2003 to 2017

**eTable 12.** Sensitivity Analyses With Total Diagnoses and Prescriptions as Offsets

**eTable 13.** Sensitivity Analysis With Simplified 3-Category Exposure

**eTable 14.** Sensitivity Analysis With Recreational Policies With 6-Category Exposure

**eTable 15.** Sensitivity Analysis Restricted to State-Months With Policy in Place

**eTable 16.** Negative Outcome Controls—All Diagnoses and All Prescriptions

**eTable 17.** Negative Exposure Control—Hypothetical Law Change

**eTable 18.** Negative Exposure Control—Naloxone Overdose Prevention Laws

**eTable 19.** Estimated Average Effect of Treatment on Treated (ATT) Comparing Sequential Levels of State Cannabis Policies Using Methods Proposed by Callaway and Sant'Anna, 2003 to 2017

This supplemental material has been provided by the authors to give readers additional information about their work.

## eAppendix 1. Preregistration

Pre-registration from August 2021 is available through Open Science Framework ([10.17605/OSF.IO/2PS64](https://osf.io/2PS64)). This pre-registration details the data structure as well as all planned primary, sensitivity, and secondary analyses. Changes and additions to the analytic plan detailed in this pre-registration are detailed below:

1. Because of potential non-independence of rates of diagnoses and claims within states over time, we calculated cluster robust standard errors for all primary, secondary, and sensitivity analyses. In subgroup analysis among Asian beneficiaries, we were unable to calculate cluster robust standard errors due to data sparsity across covariate strata when all U.S. states were included. We therefore excluded the four states (Arkansas, Montana, South Dakota, Vermont) with the fewest Asian beneficiaries. Collectively, these states contributed only 0.09% of all person-time among Asian beneficiaries over the 15-year study period. Coefficients (ORs) remained stable when observations from these states were excluded for psychosis-related diagnoses and prescribed antipsychotics.
2. We incorporated an additional sensitivity analysis in which we implemented an alternative estimator proposed by Callaway and Sant'Anna to examine the association between state cannabis policy level and psychosis-related diagnoses and prescriptions. This estimator required contrast of sequential policy levels (no policy versus medical with dispensaries; medical without dispensaries versus medical with dispensaries; medical with dispensaries versus recreational without outlets; and recreational without outlets versus recreational with outlets) to estimate associations on the additive scale. Justification and further details regarding this estimator are included in Appendix B.
3. We additionally included alcohol policy score as a covariate to control for potential confounding by state-level policy environment in all analyses.

## **eAppendix 2. Callaway and Sant’Anna Estimator**

Standard panel fixed effects analyses require the assumption that the causal effect of the treatment on the outcome is constant over time and does not depend on (a) when the unit was first treated or (b) duration of treatment. Given that late-legalizing states learned from early-legalizing states, and given that the impacts of cannabis policies may take years to develop, because factors such as social norms and commercial markets evolve over time, these assumptions are plausibly violated for cannabis policies. For this reason, we conducted a sensitivity analysis using the estimator proposed by Callaway and Sant’Anna that allows for dynamic treatment effects. (Callaway and Sant’Anna, 2021) We estimated a separate treatment effect for each unique combination of time-at-first-treatment and time-since-treatment. To estimate the overall treatment effect, the separate treatment effects were then aggregated, with weights proportional to the number of units contributing to the corresponding estimate. Estimation was implemented using the “did” package in R. We specified the doubly robust estimation method, the not-yet-treated units as the referent category, and bootstrapped standard errors.

The Callaway and Sant’Anna estimator is built for binary treatments, however our primary exposure was defined as an ordered categorical variable to capture key policy dimensions. We therefore estimated a series of contrasts for each sequential policy level (no policy versus medical with dispensaries; medical without dispensaries versus medical with dispensaries; medical with dispensaries versus recreational without outlets; and recreational without outlets versus recreational with outlets). For each contrast, we restricted the analysis to the state-months with only those two policy levels, and conducted estimation on that subset of the data, allowing for unbalanced panel data. As permitted by the estimator, we controlled for state-level covariates measured at the time step immediately prior to treatment (i.e., time-invariant). This contrasts with our primary analytic specification, which involved control for time-varying covariates. Additionally, because the Callaway and Sant’Anna uses linear models, the resulting estimates are additive-scale rate differences. This contrasts with our primary analytic specification, which involved negative binomial regression and estimated rate ratios. Comparisons between the two sets of estimates must take these differences into account.

## **References**

Callaway B, Sant’Anna PH. Difference-in-differences with multiple time periods. *Journal of Econometrics*. 2021;225(2):200-230.

**eTable 1.** Diagnostic Codes From the International Classification of Diseases, Ninth and Tenth Revision Used to Identify Psychosis

| Category                | Revision | Code                                                     | Description                                                         |
|-------------------------|----------|----------------------------------------------------------|---------------------------------------------------------------------|
| Non-affective psychoses | ICD-9    | 295.0                                                    | Simple type schizophrenia                                           |
|                         | ICD-9    | 295.00                                                   | Simple type schizophrenia, unspecified                              |
|                         | ICD-9    | 295.01                                                   | Simple type schizophrenia, subchronic                               |
|                         | ICD-9    | 295.02                                                   | Simple type schizophrenia, chronic                                  |
|                         | ICD-9    | 295.03                                                   | Simple type schizophrenia, subchronic with acute exacerbation       |
|                         | ICD-9    | 295.04                                                   | Simple type schizophrenia, chronic with acute exacerbation          |
|                         | ICD-9    | 295.05                                                   | Simple type schizophrenia, in remission                             |
|                         | ICD-9    | 295.1                                                    | Disorganized type schizophrenia                                     |
|                         | ICD-9    | 295.10                                                   | Disorganized type schizophrenia, unspecified                        |
|                         | ICD-9    | 295.11                                                   | Disorganized type schizophrenia, subchronic                         |
|                         | ICD-9    | 295.12                                                   | Disorganized type schizophrenia, chronic                            |
|                         | ICD-9    | 295.13                                                   | Disorganized type schizophrenia, subchronic with acute exacerbation |
|                         | ICD-9    | 295.14                                                   | Disorganized type schizophrenia, chronic with acute exacerbation    |
|                         | ICD-9    | 295.15                                                   | Disorganized type schizophrenia, in remission                       |
|                         | ICD-9    | 295.2                                                    | Catatonic type schizophrenia                                        |
|                         | ICD-9    | 295.20                                                   | Catatonic type schizophrenia, unspecified                           |
|                         | ICD-9    | 295.21                                                   | Catatonic type schizophrenia, subchronic                            |
|                         | ICD-9    | 295.22                                                   | Catatonic type schizophrenia, chronic                               |
|                         | ICD-9    | 295.23                                                   | Catatonic type schizophrenia, subchronic with acute exacerbation    |
|                         | ICD-9    | 295.24                                                   | Catatonic type schizophrenia, chronic with acute exacerbation       |
|                         | ICD-9    | 295.25                                                   | Catatonic type schizophrenia, in remission                          |
|                         | ICD-9    | 295.3                                                    | Paranoid type schizophrenia                                         |
|                         | ICD-9    | 295.30                                                   | Paranoid type schizophrenia, unspecified                            |
|                         | ICD-9    | 295.31                                                   | Paranoid type schizophrenia, subchronic                             |
|                         | ICD-9    | 295.32                                                   | Paranoid type schizophrenia, chronic                                |
|                         | ICD-9    | 295.33                                                   | Paranoid type schizophrenia, subchronic with acute exacerbation     |
|                         | ICD-9    | 295.34                                                   | Paranoid type schizophrenia, chronic with acute exacerbation        |
|                         | ICD-9    | 295.35                                                   | Paranoid type schizophrenia, in remission                           |
|                         | ICD-9    | 295.4                                                    | Schizophreniform disorder                                           |
|                         | ICD-9    | 295.40                                                   | Schizophreniform disorder, unspecified                              |
|                         | ICD-9    | 295.41                                                   | Schizophreniform disorder, subchronic                               |
|                         | ICD-9    | 295.42                                                   | Schizophreniform disorder, chronic                                  |
|                         | ICD-9    | 295.43                                                   | Schizophreniform disorder, subchronic with acute exacerbation       |
|                         | ICD-9    | 295.44                                                   | Schizophreniform disorder, chronic with acute exacerbation          |
|                         | ICD-9    | 295.45                                                   | Schizophreniform disorder, in remission                             |
| ICD-9                   | 295.5    | Latent schizophrenia                                     |                                                                     |
| ICD-9                   | 295.50   | Latent schizophrenia, unspecified                        |                                                                     |
| ICD-9                   | 295.51   | Latent schizophrenia, subchronic                         |                                                                     |
| ICD-9                   | 295.52   | Latent schizophrenia, chronic                            |                                                                     |
| ICD-9                   | 295.53   | Latent schizophrenia, subchronic with acute exacerbation |                                                                     |

| Category                | Revision | Code   | Description                                                                |
|-------------------------|----------|--------|----------------------------------------------------------------------------|
| Non-affective psychoses | ICD-9    | 295.54 | Latent schizophrenia, chronic with acute exacerbation                      |
|                         | ICD-9    | 295.55 | Latent schizophrenia, in remission                                         |
|                         | ICD-9    | 295.6  | Schizophrenic disorder, residual type                                      |
|                         | ICD-9    | 295.60 | Schizophrenic disorders, residual type, unspecified                        |
|                         | ICD-9    | 295.61 | Schizophrenic disorders, residual type, subchronic                         |
|                         | ICD-9    | 295.62 | Schizophrenic disorders, residual type, chronic                            |
|                         | ICD-9    | 295.63 | Schizophrenic disorders, residual type, subchronic with acute exacerbation |
|                         | ICD-9    | 295.64 | Schizophrenic disorders, residual type, chronic with acute exacerbation    |
|                         | ICD-9    | 295.65 | Schizophrenic disorders, residual type, in remission                       |
|                         | ICD-9    | 295.7  | Schizoaffective disorder                                                   |
|                         | ICD-9    | 295.70 | Schizoaffective disorder, unspecified                                      |
|                         | ICD-9    | 295.71 | Schizoaffective disorder, subchronic                                       |
|                         | ICD-9    | 295.72 | Schizoaffective disorder, chronic                                          |
|                         | ICD-9    | 295.73 | Schizoaffective disorder, subchronic with acute exacerbation               |
|                         | ICD-9    | 295.74 | Schizoaffective disorder, chronic with acute exacerbation                  |
|                         | ICD-9    | 295.75 | Schizoaffective disorder, in remission                                     |
|                         | ICD-9    | 295.8  | Other specified types of schizophrenia                                     |
|                         | ICD-9    | 295.80 | Other specified types of schizophrenia, unspecified                        |
|                         | ICD-9    | 295.81 | Other specified types of schizophrenia, subchronic                         |
|                         | ICD-9    | 295.82 | Other specified types of schizophrenia, chronic                            |
|                         | ICD-9    | 295.83 | Other specified types of schizophrenia, subchronic with acute exacerbation |
|                         | ICD-9    | 295.84 | Other specified types of schizophrenia, chronic with acute exacerbation    |
|                         | ICD-9    | 295.85 | Other specified types of schizophrenia, in remission                       |
|                         | ICD-9    | 295.9  | Unspecified schizophrenia                                                  |
|                         | ICD-9    | 295.90 | Unspecified schizophrenia, unspecified                                     |
|                         | ICD-9    | 295.91 | Unspecified schizophrenia, subchronic                                      |
|                         | ICD-9    | 295.92 | Unspecified schizophrenia, chronic                                         |
|                         | ICD-9    | 295.93 | Unspecified schizophrenia, subchronic with acute exacerbation              |
|                         | ICD-9    | 295.94 | Unspecified schizophrenia, chronic with acute exacerbation                 |
|                         | ICD-9    | 295.95 | Unspecified schizophrenia, in remission                                    |
|                         | ICD-9    | 298.8  | Other and unspecified reactive psychosis                                   |
|                         | ICD-9    | 298.88 | Other and unspecified reactive psychosis                                   |
|                         | ICD-9    | 298.89 | Other and unspecified reactive psychosis                                   |
|                         | ICD-10   | F20    | Schizophrenia                                                              |
|                         | ICD-10   | F20.0  | Paranoid schizophrenia                                                     |
|                         | ICD-10   | F20.1  | Disorganized schizophrenia                                                 |
|                         | ICD-10   | F20.2  | Catatonic schizophrenia                                                    |
|                         | ICD-10   | F20.3  | Undifferentiated schizophrenia                                             |
|                         | ICD-10   | F20.5  | Residual schizophrenia                                                     |
|                         | ICD-10   | F20.8  | Other schizophrenia                                                        |
|                         | ICD-10   | F20.81 | Schizophreniform disorder                                                  |
| Category                | Revision | Code   | Description                                                                |

|                             |                 |                 |                                                                                       |                                                        |
|-----------------------------|-----------------|-----------------|---------------------------------------------------------------------------------------|--------------------------------------------------------|
| Non-affective psychoses     | ICD-10          | F2089           | Other schizophrenia                                                                   |                                                        |
|                             | ICD-10          | F20.9           | Schizophrenia, unspecified                                                            |                                                        |
|                             | ICD-10          | F21             | Schizotypal disorder                                                                  |                                                        |
|                             | ICD-10          | F23             | Brief psychotic disorder                                                              |                                                        |
|                             | ICD-10          | F25             | Schizoaffective disorders                                                             |                                                        |
|                             | ICD-10          | F25.0           | Schizoaffective disorders, bipolar type                                               |                                                        |
|                             | ICD-10          | F25.1           | Schizoaffective disorders, depressive type                                            |                                                        |
|                             | ICD-10          | F25.8           | Other schizoaffective disorders                                                       |                                                        |
|                             | ICD-10          | F25.9           | Schizoaffective disorder, unspecified                                                 |                                                        |
|                             | ICD-10          | F28             | Other psychotic disorder not due to a substance or known physiological condition      |                                                        |
|                             | ICD-10          | F29             | Unspecified psychosis not due to a substance or known physiological condition         |                                                        |
| Substance-related Psychoses | ICD-9           | 291.3           | Alcohol-induced psychotic disorder with hallucinations                                |                                                        |
|                             | ICD-9           | 291.5           | Alcohol-induced psychotic disorder with delusions                                     |                                                        |
|                             | ICD-9           | 292.1           | Drug-induced psychotic disorders                                                      |                                                        |
|                             | ICD-9           | 292.11          | Drug-induced psychotic disorder with delusions                                        |                                                        |
|                             | ICD-9           | 292.12          | Drug-induced psychotic disorder with hallucinations                                   |                                                        |
|                             | ICD-10          | F10.15          | Alcohol abuse with alcohol-induced psychotic disorder                                 |                                                        |
|                             | ICD-10          | F10.150         | Alcohol abuse with alcohol-induced psychotic disorder, with delusions                 |                                                        |
|                             | ICD-10          | F10.151         | Alcohol abuse with alcohol-induced psychotic disorder, with hallucinations            |                                                        |
|                             | ICD-10          | F10.159         | Alcohol abuse with alcohol-induced psychotic disorder, unspecified                    |                                                        |
|                             | ICD-10          | F10.25          | Alcohol dependence with alcohol-induced psychotic disorder                            |                                                        |
|                             | ICD-10          | F10.250         | Alcohol dependence with alcohol-induced psychotic disorder, with delusions            |                                                        |
|                             | ICD-10          | F10.251         | Alcohol dependence with alcohol-induced psychotic disorder, with hallucinations       |                                                        |
|                             | ICD-10          | F10.259         | Alcohol dependence with alcohol-induced psychotic disorder, unspecified               |                                                        |
|                             | ICD-10          | F10.35          | Alcohol use, unspecified with alcohol-induced psychotic disorder                      |                                                        |
|                             | ICD-10          | F10.350         | Alcohol use, unspecified with alcohol-induced psychotic disorder, with delusions      |                                                        |
|                             | ICD-10          | F10.351         | Alcohol use, unspecified with alcohol-induced psychotic disorder, with hallucinations |                                                        |
|                             | ICD-10          | F10.359         | Alcohol use, unspecified with alcohol-induced psychotic disorder, unspecified         |                                                        |
|                             | ICD-10          | F11.15          | Opioid abuse with opioid-induced psychotic disorder                                   |                                                        |
|                             | ICD-10          | F11.150         | Opioid abuse with opioid-induced psychotic disorder, with delusions                   |                                                        |
|                             | ICD-10          | F11.151         | Opioid abuse with opioid-induced psychotic disorder, with hallucinations              |                                                        |
|                             | ICD-10          | F11.159         | Opioid abuse with opioid-induced psychotic disorder, unspecified                      |                                                        |
|                             | ICD-10          | F11.25          | Opioid dependence with opioid-induced psychotic disorder                              |                                                        |
|                             | ICD-10          | F11.250         | Opioid dependence with opioid-induced psychotic disorder, with delusions              |                                                        |
|                             | ICD-10          | F11.251         | Opioid dependence with opioid-induced psychotic disorder, with hallucinations         |                                                        |
|                             | ICD-10          | F11.259         | Opioid dependence with opioid-induced psychotic disorder, unspecified                 |                                                        |
|                             | ICD-10          | F11.95          | Opioid use, unspecified with opioid-induced psychotic disorder                        |                                                        |
|                             | ICD-10          | F11.950         | Opioid use, unspecified with opioid-induced psychotic disorder, with delusions        |                                                        |
|                             | ICD-10          | F11.951         | Opioid use, unspecified with opioid-induced psychotic disorder, with hallucinations   |                                                        |
|                             | ICD-10          | F11.959         | Opioid use, unspecified with opioid-induced psychotic disorder, unspecified           |                                                        |
|                             | ICD-10          | F12.15          | Cannabis abuse with psychotic disorder                                                |                                                        |
|                             | <b>Category</b> | <b>Revision</b> | <b>Code</b>                                                                           | <b>Description</b>                                     |
|                             |                 | ICD-10          | F12.150                                                                               | Cannabis abuse with psychotic disorder, with delusions |

|                             |                 |                                                                                      |                                                                                                                                      |
|-----------------------------|-----------------|--------------------------------------------------------------------------------------|--------------------------------------------------------------------------------------------------------------------------------------|
| Substance-related Psychoses | ICD-10          | F12.151                                                                              | Cannabis abuse with psychotic disorder, with hallucinations                                                                          |
|                             | ICD-10          | F12.159                                                                              | Cannabis abuse with psychotic disorder, unspecified                                                                                  |
|                             | ICD-10          | F12.25                                                                               | Cannabis dependence with psychotic disorder                                                                                          |
|                             | ICD-10          | F12.250                                                                              | Cannabis dependence with psychotic disorder, with delusions                                                                          |
|                             | ICD-10          | F12.251                                                                              | Cannabis dependence with psychotic disorder, with hallucinations                                                                     |
|                             | ICD-10          | F12.259                                                                              | Cannabis dependence with psychotic disorder, unspecified                                                                             |
|                             | ICD-10          | F12.95                                                                               | Cannabis use, unspecified with psychotic disorder                                                                                    |
|                             | ICD-10          | F12.950                                                                              | Cannabis use, unspecified with psychotic disorder, with delusions                                                                    |
|                             | ICD-10          | F12.951                                                                              | Cannabis use, unspecified with psychotic disorder, with hallucinations                                                               |
|                             | ICD-10          | F12.952                                                                              | Cannabis use, unspecified with psychotic disorder, unspecified                                                                       |
|                             | ICD-10          | F13.15                                                                               | Sedative, hypnotic or anxiolytic abuse with sedative, hypnotic or anxiolytic-induced psychotic disorder                              |
|                             | ICD-10          | F13.150                                                                              | Sedative, hypnotic or anxiolytic abuse with sedative, hypnotic or anxiolytic-induced psychotic disorder, with delusions              |
|                             | ICD-10          | F13.151                                                                              | Sedative, hypnotic or anxiolytic abuse with sedative, hypnotic or anxiolytic-induced psychotic disorder, with hallucinations         |
|                             | ICD-10          | F13.159                                                                              | Sedative, hypnotic or anxiolytic abuse with sedative, hypnotic or anxiolytic-induced psychotic disorder, unspecified                 |
|                             | ICD-10          | F13.25                                                                               | Sedative, hypnotic or anxiolytic dependence with sedative, hypnotic or anxiolytic-induced psychotic disorder                         |
|                             | ICD-10          | F13.250                                                                              | Sedative, hypnotic or anxiolytic dependence with sedative, hypnotic or anxiolytic-induced psychotic disorder, with delusions         |
|                             | ICD-10          | F13.251                                                                              | Sedative, hypnotic or anxiolytic dependence with sedative, hypnotic or anxiolytic-induced psychotic disorder, with hallucinations    |
|                             | ICD-10          | F13.259                                                                              | Sedative, hypnotic or anxiolytic dependence with sedative, hypnotic or anxiolytic-induced psychotic disorder, unspecified            |
|                             | ICD-10          | F13.95                                                                               | Sedative, hypnotic or anxiolytic use, unspecified with sedative, hypnotic or anxiolytic-induced psychotic disorder                   |
|                             | ICD-10          | F13.950                                                                              | Sedative, hypnotic or anxiolytic use, unspecified with sedative, hypnotic or anxiolytic-induced psychotic disorder, with delusions   |
|                             | ICD-10          | F13.951                                                                              | Sedative, hypnotic or anxiolytic use, unspecified with sedative, hypnotic or anxiolytic-induced psychotic disorder, w/hallucinations |
|                             | ICD-10          | F13.959                                                                              | Sedative, hypnotic or anxiolytic use, unspecified with sedative, hypnotic or anxiolytic-induced psychotic disorder, unspecified      |
|                             | ICD-10          | F14.15                                                                               | Cocaine abuse with cocaine-induced psychotic disorder                                                                                |
|                             | ICD-10          | F14.150                                                                              | Cocaine abuse with cocaine-induced psychotic disorder, with delusions                                                                |
|                             | ICD-10          | F14.151                                                                              | Cocaine abuse with cocaine-induced psychotic disorder, with hallucinations                                                           |
|                             | ICD-10          | F14.159                                                                              | Cocaine abuse with cocaine-induced psychotic disorder, unspecified                                                                   |
|                             | ICD-10          | F14.25                                                                               | Cocaine dependence with cocaine-induced psychotic disorder                                                                           |
|                             | ICD-10          | F14.250                                                                              | Cocaine dependence with cocaine-induced psychotic disorder, with delusions                                                           |
|                             | ICD-10          | F14.251                                                                              | Cocaine dependence with cocaine-induced psychotic disorder, with hallucinations                                                      |
|                             | ICD-10          | F14.259                                                                              | Cocaine dependence with cocaine-induced psychotic disorder, unspecified                                                              |
|                             | ICD-10          | F14.95                                                                               | Cocaine use, unspecified with cocaine-induced psychotic disorder                                                                     |
|                             | ICD-10          | F14.950                                                                              | Cocaine use, unspecified with cocaine-induced psychotic disorder, with delusions                                                     |
|                             | ICD-10          | F14.951                                                                              | Cocaine use, unspecified with cocaine-induced psychotic disorder, with hallucinations                                                |
| ICD-10                      | F14.959         | Cocaine use, unspecified with cocaine-induced psychotic disorder, unspecified        |                                                                                                                                      |
| ICD-10                      | F15.15          | Other stimulant abuse with stimulant-induced psychotic disorder                      |                                                                                                                                      |
| ICD-10                      | F15.150         | Other stimulant abuse with stimulant-induced psychotic disorder, with delusions      |                                                                                                                                      |
| ICD-10                      | F15.151         | Other stimulant abuse with stimulant-induced psychotic disorder, with hallucinations |                                                                                                                                      |
| ICD-10                      | F15.159         | Other stimulant abuse with stimulant-induced psychotic disorder, unspecified         |                                                                                                                                      |
| ICD-10                      | F15.25          | Other stimulant dependence with stimulant-induced psychotic                          |                                                                                                                                      |
| ICD-10                      | F15.250         | Other stimulant dependence with stimulant-induced psychotic, with delusions          |                                                                                                                                      |
| <b>Category</b>             | <b>Revision</b> | <b>Code</b>                                                                          | <b>Description</b>                                                                                                                   |
|                             | ICD-10          | F15.251                                                                              | Other stimulant dependence with stimulant-induced psychotic, with hallucinations                                                     |
|                             | ICD-10          | F15.259                                                                              | Other stimulant dependence with stimulant-induced psychotic, unspecified                                                             |



|                             |                 |                 |                                                                                                                           |
|-----------------------------|-----------------|-----------------|---------------------------------------------------------------------------------------------------------------------------|
| Substance-related psychosis | ICD-10          | F15.95          | Other stimulant use, unspecified with stimulant-induced psychotic disorder                                                |
|                             | ICD-10          | F15.950         | Other stimulant use, unspecified with stimulant-induced psychotic disorder, with delusions                                |
|                             | ICD-10          | F15.951         | Other stimulant use, unspecified with stimulant-induced psychotic disorder, with hallucinations                           |
|                             | ICD-10          | F15.959         | Other stimulant use, unspecified with stimulant-induced psychotic disorder, unspecified                                   |
|                             | ICD-10          | F16.15          | Hallucinogen abuse with hallucinogen-induced psychotic disorder                                                           |
|                             | ICD-10          | F16.150         | Hallucinogen abuse with hallucinogen-induced psychotic disorder, with delusions                                           |
|                             | ICD-10          | F16.151         | Hallucinogen abuse with hallucinogen-induced psychotic disorder, with hallucinations                                      |
|                             | ICD-10          | F16.159         | Hallucinogen abuse with hallucinogen-induced psychotic disorder, unspecified                                              |
|                             | ICD-10          | F16.25          | Hallucinogen dependence with hallucinogen-induced psychotic disorder                                                      |
|                             | ICD-10          | F16.250         | Hallucinogen dependence with hallucinogen-induced psychotic disorder,with delusions                                       |
|                             | ICD-10          | F16.251         | Hallucinogen dependence with hallucinogen-induced psychotic disorder, with hallucinations                                 |
|                             | ICD-10          | F16.259         | Hallucinogen dependence with hallucinogen-induced psychotic disorder, unspecified                                         |
|                             | ICD-10          | F16.95          | Hallucinogen use, unspecified with hallucinogen-induced psychotic disorder                                                |
|                             | ICD-10          | F16.950         | Hallucinogen use, unspecified with hallucinogen-induced psychotic disorder, with delusions                                |
|                             | ICD-10          | F16.951         | Hallucinogen use, unspecified with hallucinogen-induced psychotic disorder, with hallucinations                           |
|                             | ICD-10          | F16.959         | Hallucinogen use, unspecified with hallucinogen-induced psychotic disorder, unspecified                                   |
|                             | ICD-10          | F18.15          | Inhalant abuse with inhalant-induced psychotic disorder                                                                   |
|                             | ICD-10          | F18.150         | Inhalant abuse with inhalant-induced psychotic disorder, with delusions                                                   |
|                             | ICD-10          | F18.151         | Inhalant abuse with inhalant-induced psychotic disorder, with hallucinations                                              |
|                             | ICD-10          | F18.159         | Inhalant abuse with inhalant-induced psychotic disorder, unspecified                                                      |
|                             | ICD-10          | F18.25          | Inhalant dependence with inhalant-induced psychotic disorder                                                              |
|                             | ICD-10          | F18.250         | Inhalant dependence with inhalant-induced psychotic disorder, with delusions                                              |
|                             | ICD-10          | F18.251         | Inhalant dependence with inhalant-induced psychotic disorder, with hallucinations                                         |
|                             | ICD-10          | F18.259         | Inhalant dependence with inhalant-induced psychotic disorder, unspecified                                                 |
|                             | ICD-10          | F18.95          | Inhalant use, unspecified with inhalant-induced psychotic disorder                                                        |
|                             | ICD-10          | F18.950         | Inhalant use, unspecified with inhalant-induced psychotic disorder, with delusions                                        |
|                             | ICD-10          | F18.951         | Inhalant use, unspecified with inhalant-induced psychotic disorder, with hallucinations                                   |
|                             | ICD-10          | F18.959         | Inhalant use, unspecified with inhalant-induced psychotic disorder, unspecified                                           |
|                             | ICD-10          | F19.15          | Other psychoactive substance abuse with psychoactive substance-induced psychotic disorder                                 |
|                             | ICD-10          | F19.150         | Other psychoactive substance abuse with psychoactive substance-induced psychotic disorder, with delusions                 |
|                             | ICD-10          | F19.151         | Other psychoactive substance abuse with psychoactive substance-induced psychotic disorder, with hallucinations            |
|                             | ICD-10          | F19.159         | Other psychoactive substance abuse with psychoactive substance-induced psychotic disorder, unspecified                    |
|                             | ICD-10          | F19.25          | Other psychoactive substance dependence with psychoactive substance-induced psychotic disorder                            |
|                             | ICD-10          | F19.250         | Other psychoactive substance dependence with psychoactive substance-induced psychotic disorder, with delusions            |
|                             | ICD-10          | F19.251         | Other psychoactive substance dependence with psychoactive substance-induced psychotic disorder, with hallucinations       |
|                             | ICD-10          | F19.259         | Other psychoactive substance dependence with psychoactive substance-induced psychotic disorder, unspecified               |
|                             | ICD-10          | F19.95          | Other psychoactive substance use, unspecified with psychoactive substance-induced psychotic disorder                      |
|                             | ICD-10          | F19.950         | Other psychoactive substance use, unspecified with psychoactive substance-induced psychotic disorder, with delusions      |
|                             | ICD-10          | F19.951         | Other psychoactive substance use, unspecified with psychoactive substance-induced psychotic disorder, with hallucinations |
|                             | <b>Category</b> | <b>Revision</b> | <b>Code</b>                                                                                                               |
| Substance-related psychosis | ICD-10          | F19.959         | Other psychoactive substance use, unspecified with psychoactive substance-induced psychotic disorder, unspecified         |
|                             | ICD-9           | 296.04          | Bipolar I disorder, single manic episode, severe, specified as with psychotic behavior                                    |

|                                        |        |        |                                                                                                              |
|----------------------------------------|--------|--------|--------------------------------------------------------------------------------------------------------------|
| Mood disorders with psychotic features | ICD-9  | 296.14 | Manic affective disorder, recurrent episode, severe, specified as with psychotic behavior                    |
|                                        | ICD-9  | 296.24 | Major depressive affective disorder, single episode, severe, specified as with psychotic behavior            |
|                                        | ICD-9  | 296.34 | Major depressive affective disorder, recurrent episode, severe, specified as with psychotic behavior         |
|                                        | ICD-9  | 296.44 | Bipolar I disorder, most recent episode (or current) manic, severe, specified as with psychotic behavior     |
|                                        | ICD-9  | 296.54 | Bipolar I disorder, most recent episode (or current) depressed, severe, specified as with psychotic behavior |
|                                        | ICD-9  | 296.64 | Bipolar I disorder, most recent episode (or current) mixed, severe, specified as with psychotic behavior     |
|                                        | ICD-10 | F30.2  | Manic episode, severe with psychotic symptoms                                                                |
|                                        | ICD-10 | F31.2  | Bipolar disorder, current episode manic severe with psychotic features                                       |
|                                        | ICD-10 | F31.5  | Bipolar disorder, current episode depressed, severe, with psychotic features                                 |
|                                        | ICD-10 | F31.64 | Bipolar disorder, current episode mixed, severe, with psychotic features                                     |
|                                        | ICD-10 | F32.3  | Major depressive disorder, single episode, severe with psychotic features                                    |
|                                        | ICD-10 | F33.3  | Major depressive disorder, recurrent, severe with psychotic symptoms                                         |
| Other psychotic disorders              | ICD-9  | 290.8  | Other specified senile psychotic conditions                                                                  |
|                                        | ICD-9  | 290.9  | Unspecified senile psychotic condition                                                                       |
|                                        | ICD-9  | 293.81 | Psychotic disorder with delusions in conditions classified elsewhere                                         |
|                                        | ICD-9  | 293.82 | Psychotic disorder with hallucinations in conditions classified elsewhere                                    |
|                                        | ICD-10 | F06.0  | Psychotic disorder with hallucinations due to known physiological                                            |
|                                        | ICD-10 | F06.2  | Psychotic disorder with delusions due to known physiological condition                                       |

**eTable 2.** Typical and Atypical Antipsychotics

| <b>Typical Antipsychotics</b>                                                                                                                                                                                 | <b>Atypical Antipsychotics</b>                                                                                                                               |
|---------------------------------------------------------------------------------------------------------------------------------------------------------------------------------------------------------------|--------------------------------------------------------------------------------------------------------------------------------------------------------------|
| Acetophenazine<br>Chlorpromazine<br>Chlorprothixene<br>Fluphenazine<br>Haloperidol<br>Loxapine<br>Mesoridazine<br>Molindone<br>Perphenazine<br>Pimozide<br>Prochlorperazine<br>Thiothixene<br>Trifluoperazine | Aripiprazole<br>Asenapine<br>Clozapine<br>Cariprazine<br>Iloperidone<br>Lurasidone<br>Olanzapine<br>Paliperidone<br>Risperidone<br>Quetiapine<br>Ziprasidone |

**eTable 3.** Distribution of State Characteristics Overall and by Policy Type, 2003 to 2017

|                                  | <b>Overall</b> | <b>No policy</b> | <b>Medical,<br/>no retail outlets</b> | <b>Medical, retail<br/>outlets</b> | <b>Recreational,<br/>no retail<br/>outlets</b> | <b>Recreational,<br/>retail outlets</b> |
|----------------------------------|----------------|------------------|---------------------------------------|------------------------------------|------------------------------------------------|-----------------------------------------|
| State Months                     | 9,180 (100.0)  | 6,144 (67.0)     | 1,469 (16.2)                          | 1,259 (13.9)                       | 125 (1.4)                                      | 138 (1.5)                               |
| States contributing time at risk | 51 (100.0)     | 43 (84.0)        | 28 (55.0)                             | 23 (45.0)                          | 8 (16.0)                                       | 5 (10.0)                                |
| Percent Non-Hispanic Asian       | 3.6%           | 2.2%             | 7.8%                                  | 4.9%                               | 5.9%                                           | 5.4%                                    |
| Percent Non-Hispanic Black       | 11.0%          | 12.5%            | 8.6%                                  | 6.7%                               | 15.9%                                          | 3.6%                                    |
| Percent Hispanic                 | 10.2%          | 8.3%             | 9.6%                                  | 18.5%                              | 14.3%                                          | 15.6%                                   |
| Percent Non-Hispanic White       | 71.5%          | 74.2%            | 66.4%                                 | 65.8%                              | 57.7%                                          | 69.3%                                   |
| Percent Unemployed               | 6.0%           | 5.8%             | 5.9%                                  | 7.1%                               | 6.3%                                           | 5.4%                                    |
| Percent Renters                  | 33.7%          | 32.4%            | 35.8%                                 | 36.2%                              | 44.0%                                          | 37.4%                                   |
| Median Income                    | \$50,048       | \$47,171         | \$55,500                              | \$54,526                           | \$66,023                                       | \$62,217                                |

**eTable 4.** Crude Rates for Psychosis-Related Diagnoses and Prescriptions, 2003 to 2017

|                                        | DIAGNOSES <sup>1</sup> |               |                                     | PRESCRIPTIONS <sup>2</sup> |               |                                     |
|----------------------------------------|------------------------|---------------|-------------------------------------|----------------------------|---------------|-------------------------------------|
|                                        | Cases                  | Person-Months | Crude Rate <sup>3</sup><br>(95% CI) | Cases                      | Person-Months | Crude Rate <sup>3</sup><br>(95% CI) |
| <b>No policy</b>                       | 5,138,845              | 1,399,958,524 | 3.670 (3.667 – 3.674)               | 13,580,218                 | 1,399,958,524 | 9.70 (9.69 – 9.71)                  |
| <b>Medical, no retail outlets</b>      | 863,828                | 172,068,754   | 5.020 (5.010, 5.031)                | 1,993,510                  | 172,068,754   | 11.59 (11.57 – 11.60)               |
| <b>Medical, retail outlets</b>         | 1,157,933              | 370,695,920   | 3.124 (3.118 – 3.129)               | 4,014,831                  | 370,695,920   | 10.83 (10.82 – 10.84)               |
| <b>Recreational, no retail outlets</b> | 128,947                | 33,285,610    | 3.874 (3.853 – 3.895)               | 457,553                    | 33,285,610    | 13.75 (13.71 – 13.79)               |
| <b>Recreational, retail outlets</b>    | 214,354                | 39,180,898    | 5.471 (5.448 – 5.494)               | 753,172                    | 39,180,898    | 19.22 (19.18 – 19.27)               |

1. Includes all unique diagnoses for schizophrenia, schizophreniform, and schizoaffective disorders; substance-related psychosis, mood disorder with psychotic features, and other forms of psychosis for each policy type over the study period.
2. Includes all unique prescriptions for first- and second-generation antipsychotics for each policy type over the study period.
3. Crude rates are calculated as the number of diagnoses or prescriptions, respectively, per 1,000 person-months of follow-up. 95% confidence intervals were calculated using Byar’s approximation.

**eTable 5.** Adjusted Rate Ratios for the Association Between State Cannabis Policy Level and Psychosis-Related Diagnoses and Prescribed Antipsychotics, 2003 to 2017

|                                        | <b>Diagnoses</b> <sup>1</sup>             | <b>Prescriptions</b> <sup>2</sup>         |
|----------------------------------------|-------------------------------------------|-------------------------------------------|
|                                        | <b>Rate Ratio (95% CI)</b> <sup>3,4</sup> | <b>Rate Ratio (95% CI)</b> <sup>3,4</sup> |
| <b>No policy</b>                       | (Ref)                                     | (Ref)                                     |
| <b>Medical, no retail outlets</b>      | 1.13 (0.94 – 1.36)                        | 1.00 (0.88 – 1.13)                        |
| <b>Medical, retail outlets</b>         | 1.24 (0.96 – 1.61)                        | 1.01 (0.87 – 1.19)                        |
| <b>Recreational, no retail outlets</b> | 1.38 (0.93 – 2.04)                        | 1.13 (0.84 – 1.51)                        |
| <b>Recreational, retail outlets</b>    | 1.39 (0.98 – 1.97)                        | 1.14 (0.89 – 1.45)                        |

1. Includes all unique diagnoses for schizophrenia, schizophreniform, and schizoaffective disorders; substance-related psychosis, mood disorder with psychotic features, and other psychosis by policy type.
2. Includes all unique prescriptions for first- and second-generation antipsychotics by policy type.
3. Rate ratios were calculated using negative binomial models with person-months at risk as the offset. Models were adjusted for state-level confounders including percent non-Hispanic Black, non-Hispanic Asian, and Hispanic; percent unemployed and percent renting their home; median income; and the overall claims rate. We included fixed effects for state, year, and calendar month to address spatial and temporal autocorrelation.
4. 95% CI were calculated with robust standard errors to account for repeated observations within states over time.

**eTable 6.** Adjusted Rate Ratios for the Association Between State Cannabis Policy Level and Psychosis-Related Diagnoses and Prescribed Antipsychotics by Sex, 2003 to 2017

|                                        | WOMEN                      |                            | MEN                        |                            |
|----------------------------------------|----------------------------|----------------------------|----------------------------|----------------------------|
|                                        | Diagnoses                  | Prescriptions              | Diagnoses                  | Prescriptions              |
|                                        | RR (95% CI) <sup>1,2</sup> | RR (95% CI) <sup>1,2</sup> | RR (95% CI) <sup>1,2</sup> | RR (95% CI) <sup>1,2</sup> |
| <b>No policy</b>                       | (Ref)                      | (Ref)                      | (Ref)                      | (Ref)                      |
| <b>Medical, no retail outlets</b>      | 1.12 (0.93 – 1.34)         | 0.97 (0.86 – 1.10)         | 1.12 (0.93 – 1.35)         | 1.03 (0.90 – 1.17)         |
| <b>Medical, retail outlets</b>         | 1.20 (0.92 – 1.56)         | 0.98 (0.85 – 1.14)         | 1.27 (0.89 – 1.65)         | 1.05 (0.88 – 1.25)         |
| <b>Recreational, no retail outlets</b> | 1.20 (0.79 – 1.84)         | 1.06 (0.80 – 1.42)         | 1.62 (1.08 – 2.41)         | 1.21 (0.90 – 1.64)         |
| <b>Recreational, retail outlets</b>    | 1.36 (0.94 – 1.98)         | 1.08 (0.87 – 1.35)         | 1.42 (1.01 – 2.01)         | 1.21 (0.92 – 1.59)         |

1. Rate ratios were calculated using negative binomial models with person-months at risk as the offset. Models were adjusted for state-level confounders including percent non-Hispanic Black, non-Hispanic Asian, and Hispanic; percent unemployed and percent renting their home; median income; and the overall claims rate. We included fixed effects for state, year, and calendar month to address spatial and temporal autocorrelation.
2. 95% CI were calculated with robust standard errors to account for repeated observations within states over time.

**eTable 7.** Adjusted Rate Ratios for the Association Between State Cannabis Policy Level and Psychosis-Related Diagnoses and Prescribed Antipsychotics by Age Group, 2003 to 2017

|                                 | <b>Diagnoses</b> <sup>1</sup>             | <b>Prescriptions</b> <sup>2</sup>         |
|---------------------------------|-------------------------------------------|-------------------------------------------|
|                                 | <b>Rate Ratio (95% CI)</b> <sup>3,4</sup> | <b>Rate Ratio (95% CI)</b> <sup>3,4</sup> |
| <b>16 to 34 years</b>           |                                           |                                           |
| No policy                       | (Ref)                                     | (Ref)                                     |
| Medical, no retail outlets      | 1.02 (0.85 – 1.22)                        | 0.98 (0.90 – 1.07)                        |
| Medical, retail outlets         | 1.13 (0.91 – 1.40)                        | 1.00 (0.91 – 1.09)                        |
| Recreational, no retail outlets | 1.36 (0.99 – 1.88)                        | 1.02 (0.89 – 1.17)                        |
| Recreational, retail outlets    | 1.28 (0.73 – 2.26)                        | 0.97 (0.74 – 1.28)                        |
| <b>35 to 54 years</b>           |                                           |                                           |
| No policy                       | (Ref)                                     | (Ref)                                     |
| Medical, no retail outlets      | 1.06 (0.82 – 1.36)                        | 0.97 (0.82 – 1.15)                        |
| Medical, retail outlets         | 1.27 (0.92 – 1.74)                        | 1.06 (0.87 – 1.30)                        |
| Recreational, no retail outlets | 1.70 (1.05 – 2.77)                        | 1.25 (0.95 – 1.65)                        |
| Recreational, retail outlets    | 1.55 (0.94 – 2.55)                        | 1.16 (0.85 – 1.58)                        |
| <b>55 to 64 years</b>           |                                           |                                           |
| No policy                       | (Ref)                                     | (Ref)                                     |
| Medical, no retail outlets      | 1.13 (0.88 – 1.43)                        | 0.99 (0.84 – 1.18)                        |
| Medical, retail outlets         | 1.47 (1.05 – 2.04)                        | 1.11 (0.91 – 1.35)                        |
| Recreational, no retail outlets | 2.03 (1.27 – 3.27)                        | 1.38 (0.96 – 1.99)                        |
| Recreational, retail outlets    | 1.94 (1.21 – 3.12)                        | 1.47 (1.13 – 1.92)                        |
| <b>65 years and older</b>       |                                           |                                           |
| No policy                       | (Ref)                                     | (Ref)                                     |
| Medical, no retail outlets      | 0.96 (0.82 – 1.13)                        | 0.88 (0.73 – 1.05)                        |
| Medical, retail outlets         | 1.01 (0.81 – 1.27)                        | 0.90 (0.72 – 1.13)                        |
| Recreational, no retail outlets | 0.94 (0.63 – 1.39)                        | 1.05 (0.74 – 1.49)                        |
| Recreational, retail outlets    | 1.24 (0.93 – 1.66)                        | 1.33 (0.98 – 1.81)                        |

1. Includes all unique diagnoses for schizophrenia, schizophreniform, and schizoaffective disorders; substance-related psychosis, mood disorder with psychotic features, and other psychosis by policy type.
2. Includes all unique prescriptions for first- and second-generation antipsychotics by policy type.
3. Rate ratios were calculated using negative binomial models with person-months at risk as the offset. Models were adjusted for state-level confounders including percent non-Hispanic Black, non-Hispanic Asian, and Hispanic; percent unemployed and percent renting their home; median income; and the overall claims rate. We included fixed effects for state, year, and calendar month to address spatial and temporal autocorrelation.
4. 95% CI were calculated with robust standard errors to account for repeated observations within states over time.



**eTable 8.** Adjusted Rate Ratios for the Association Between State Cannabis Policy Level and Psychosis-Related Diagnoses and Prescribed Antipsychotics by Age Group, 2003 to 2017

|                                 | WOMEN                      |                            | MEN                        |                            |
|---------------------------------|----------------------------|----------------------------|----------------------------|----------------------------|
|                                 | Diagnoses                  | Prescriptions              | Diagnoses                  | Prescriptions              |
|                                 | RR (95% CI) <sup>1,2</sup> | RR (95% CI) <sup>1,2</sup> | RR (95% CI) <sup>1,2</sup> | RR (95% CI) <sup>1,2</sup> |
| <b>16 to 34 years</b>           |                            |                            |                            |                            |
| No policy                       | (Ref)                      | (Ref)                      | (Ref)                      | (Ref)                      |
| Medical, no retail outlets      | 1.00 (0.85 – 1.17)         | 0.99 (0.92 – 1.07)         | 1.03 (0.84 – 1.27)         | 0.96 (0.88 – 1.05)         |
| Medical, retail outlets         | 1.03 (0.84 – 1.27)         | 0.96 (0.88 – 1.06)         | 1.19 (0.96 – 1.49)         | 1.00 (0.90 – 1.10)         |
| Recreational, no retail outlets | 1.35 (0.88 – 2.08)         | 0.90 (0.80 – 1.01)         | 1.35 (0.96 – 1.91)         | 1.05 (0.87 – 1.26)         |
| Recreational, retail outlets    | 1.36 (0.70 – 2.63)         | 0.88 (0.68 – 1.13)         | 1.19 (0.71 – 2.01)         | 0.94 (0.69 – 1.27)         |
| <b>35 to 54 years</b>           |                            |                            |                            |                            |
| No policy                       | (Ref)                      | (Ref)                      | (Ref)                      | (Ref)                      |
| Medical, no retail outlets      | 1.04 (0.79 – 1.35)         | 0.95 (0.82 – 1.11)         | 1.04 (0.79 – 1.38)         | 0.99 (0.82 – 1.20)         |
| Medical, retail outlets         | 1.19 (0.88 – 1.62)         | 1.01 (0.86 – 1.20)         | 1.30 (0.92 – 1.83)         | 1.04 (0.80 – 1.34)         |
| Recreational, no retail outlets | 1.44 (0.92 – 2.24)         | 1.11 (0.85 – 1.43)         | 1.91 (1.12 – 3.24)         | 1.24 (0.89 – 1.75)         |
| Recreational, retail outlets    | 1.30 (0.76 – 2.25)         | 1.01 (0.77 – 1.33)         | 1.79 (1.11 – 2.88)         | 1.10 (0.76 – 1.59)         |
| <b>55 to 64 years</b>           |                            |                            |                            |                            |
| No policy                       | (Ref)                      | (Ref)                      | (Ref)                      | (Ref)                      |
| Medical, no retail outlets      | 1.11 (0.88 – 1.41)         | 0.96 (0.82 – 1.11)         | 1.12 (0.87 – 1.44)         | 1.04 (0.87 – 1.24)         |
| Medical, retail outlets         | 1.37 (1.01 – 1.85)         | 1.04 (0.86 – 1.25)         | 1.49 (1.04 – 2.14)         | 1.13 (0.92 – 1.39)         |
| Recreational, no retail outlets | 1.62 (0.99 – 2.64)         | 1.22 (0.86 – 1.72)         | 2.44 (1.47 – 4.06)         | 1.36 (0.94 – 1.97)         |
| Recreational, retail outlets    | 1.66 (1.06 – 2.61)         | 1.27 (0.99 – 1.63)         | 2.32 (1.34 – 4.03)         | 1.42 (1.06 – 1.91)         |
| <b>65 years and older</b>       |                            |                            |                            |                            |
| No policy                       | (Ref)                      | (Ref)                      | (Ref)                      | (Ref)                      |
| Medical, no retail outlets      | 0.97 (0.83 – 1.13)         | 0.86 (0.72 – 1.03)         | 0.93 (0.76 – 1.12)         | 0.92 (0.78 – 1.08)         |
| Medical, retail outlets         | 1.02 (0.81 – 1.27)         | 0.88 (0.71 – 1.10)         | 1.02 (0.80 – 1.29)         | 0.96 (0.79 – 1.17)         |
| Recreational, no retail outlets | 0.90 (0.58 – 1.40)         | 0.99 (0.71 – 1.40)         | 1.09 (0.74 – 1.58)         | 1.09 (0.77 – 1.55)         |
| Recreational, retail outlets    | 1.40 (1.03 – 1.89)         | 1.24 (0.92 – 1.69)         | 0.99 (0.72 – 1.37)         | 1.28 (0.97 – 1.70)         |

1. Rate ratios were calculated using negative binomial models with person-months at risk as the offset. Models were adjusted for state-level confounders including percent non-Hispanic Black, non-Hispanic Asian, and Hispanic; percent unemployed and percent renting their home; median income; and the overall claims rate. We included fixed effects for state, year, and calendar month to address spatial and temporal autocorrelation.
2. 95% CI were calculated with robust standard errors to account for repeated observations within states over time.

**eTable 9.** Adjusted Rate Ratios for the Association Between State Cannabis Policy Level and Psychosis-Related Diagnoses and Prescribed Antipsychotics by Race and Ethnicity, 2003 to 2017

|                                 | <b>Diagnoses</b> <sup>1</sup>             | <b>Prescriptions</b> <sup>2</sup>         |
|---------------------------------|-------------------------------------------|-------------------------------------------|
|                                 | <b>Rate Ratio (95% CI)</b> <sup>3,4</sup> | <b>Rate Ratio (95% CI)</b> <sup>3,4</sup> |
| <b>Asian</b> <sup>5</sup>       |                                           |                                           |
| No policy                       | (Ref)                                     | (Ref)                                     |
| Medical, no retail outlets      | 1.09 (0.92 – 1.29)                        | 0.97 (0.83 – 1.14)                        |
| Medical, retail outlets         | 1.24 (0.98 – 1.57)                        | 1.02 (0.86 – 1.22)                        |
| Recreational, no retail outlets | 1.46 (1.08 – 2.38)                        | 1.07 (0.76 – 1.49)                        |
| Recreational, retail outlets    | 1.61 (1.08 – 2.38)                        | 1.22 (0.96 – 1.56)                        |
| <b>Black</b>                    |                                           |                                           |
| No policy                       | (Ref)                                     | (Ref)                                     |
| Medical, no retail outlets      | 1.13 (0.85 – 1.52)                        | 0.94 (0.76 – 1.17)                        |
| Medical, retail outlets         | 1.04 (0.77 – 1.39)                        | 0.92 (0.74 – 1.15)                        |
| Recreational, no retail outlets | 1.16 (0.70 – 1.92)                        | 1.01 (0.69 – 1.49)                        |
| Recreational, retail outlets    | 1.43 (0.86 – 2.39)                        | 0.97 (0.69 – 1.36)                        |
| <b>Hispanic</b>                 |                                           |                                           |
| No policy                       | (Ref)                                     | (Ref)                                     |
| Medical, no retail outlets      | 1.03 (0.84 – 1.28)                        | 1.01 (0.85 – 1.19)                        |
| Medical, retail outlets         | 1.28 (0.93 – 1.75)                        | 1.09 (0.85 – 1.39)                        |
| Recreational, no retail outlets | 1.38 (0.75 – 2.52)                        | 1.08 (0.72 – 1.62)                        |
| Recreational, retail outlets    | 1.74 (1.09 – 2.78)                        | 1.17 (0.87 – 1.57)                        |
| <b>White</b>                    |                                           |                                           |
| No policy                       | (Ref)                                     | (Ref)                                     |
| Medical, no retail outlets      | 1.11 (0.94 – 1.32)                        | 0.97 (0.86 – 1.08)                        |
| Medical, retail outlets         | 1.29 (1.00 – 1.66)                        | 0.98 (0.86 – 1.12)                        |
| Recreational, no retail outlets | 1.39 (0.97 – 1.99)                        | 1.02 (0.81 – 1.29)                        |
| Recreational, retail outlets    | 1.45 (1.03 – 2.04)                        | 1.11 (0.89 – 1.39)                        |

1. Includes all unique diagnoses for schizophrenia, schizophreniform, and schizoaffective disorders; substance-related psychosis, mood disorder with psychotic features, and other psychosis by policy type.
2. Includes all unique prescriptions for first- and second-generation antipsychotics by policy type.
3. Rate ratios were calculated using negative binomial models with person-months at risk as the offset. Models were adjusted for state-level confounders including percent non-Hispanic Black, non-Hispanic Asian, and Hispanic; percent unemployed and percent renting their home; median income; and the overall claims rate. We included fixed effects for state, year, and calendar month to address spatial and temporal autocorrelation.
4. 95% CI were calculated with robust standard errors to account for repeated observations within states over time.
5. Because of sparsity of observations for Asian beneficiaries across covariate strata, we excluded observations from VT, SD, MT, and AK in order to calculate robust standard errors.

**eTable 10.** Adjusted Rate Ratios for Psychosis-Related Diagnoses by Subtype, 2003 to 2017

|                                        | <b>Non-affective psychotic disorders</b> | <b>Mood disorders with psychotic features</b> | <b>Substance-related psychosis</b>       | <b>Other psychotic disorders</b>         |
|----------------------------------------|------------------------------------------|-----------------------------------------------|------------------------------------------|------------------------------------------|
|                                        | <b>Rate Ratio (95% CI)<sup>1,2</sup></b> | <b>Rate Ratio (95% CI)<sup>1,2</sup></b>      | <b>Rate Ratio (95% CI)<sup>1,2</sup></b> | <b>Rate Ratio (95% CI)<sub>1,2</sub></b> |
| <b>No policy</b>                       | (Ref)                                    | (Ref)                                         | (Ref)                                    | (Ref)                                    |
| <b>Medical, no retail outlets</b>      | 1.13 (0.94 – 1.37)                       | 1.06 (0.87 – 1.29)                            | 1.09 (0.93 – 1.28)                       | 1.16 (0.88 – 1.52)                       |
| <b>Medical, retail outlets</b>         | 1.24 (0.94 – 1.62)                       | 1.06 (0.86 – 1.30)                            | 1.14 (0.91 – 1.42)                       | 1.62 (1.19 – 2.22)                       |
| <b>Recreational, no retail outlets</b> | 1.37 (0.89 – 2.10)                       | 1.08 (0.72 – 1.60)                            | 1.29 (0.94 – 1.76)                       | 1.07 (0.63 – 1.84)                       |
| <b>Recreational, retail outlets</b>    | 1.38 (0.97 – 1.97)                       | 0.89 (0.54 – 1.47)                            | 1.37 (0.93 – 2.03)                       | 1.13 (0.31 – 4.08)                       |

1. Rate ratios were calculated using negative binomial models with person-months at risk as the offset. Models were adjusted for state-level confounders including percent non-Hispanic Black, non-Hispanic Asian, and Hispanic; percent unemployed and percent renting their home; median income; and the overall claims rate. We included fixed effects for state, year, and calendar month to address spatial and temporal autocorrelation.
2. 95% CI were calculated with robust standard errors to account for repeated observations within states over time.

**eTable 11.** Adjusted Rate Ratios for the Association Between State Cannabis Policy Level for First-Generation and Second-Generation Antipsychotics, 2003 to 2017

|                                        | <b>First Generation</b> <sup>1</sup>      | <b>Second Generation</b> <sup>2</sup>     |
|----------------------------------------|-------------------------------------------|-------------------------------------------|
|                                        | <b>Rate Ratio (95% CI)</b> <sup>3,4</sup> | <b>Rate Ratio (95% CI)</b> <sup>3,4</sup> |
| <b>No policy</b>                       | (Ref)                                     | (Ref)                                     |
| <b>Medical, no retail outlets</b>      | 1.07 (0.89 – 1.29)                        | 0.99 (0.87 – 1.12)                        |
| <b>Medical, retail outlets</b>         | 1.04 (0.82 – 1.32)                        | 1.01 (0.87 – 1.17)                        |
| <b>Recreational, no retail outlets</b> | 1.14 (0.77 – 1.70)                        | 1.12 (0.84 – 1.48)                        |
| <b>Recreational, retail outlets</b>    | 1.14 (0.77 – 1.70)                        | 1.12 (0.89 – 1.43)                        |

1. First-generation antipsychotics included acetophenazine, chlorpromazine, chlorprothixene, fluphenazine, haloperidol, loxapine, mesoridazine, molindone, perphenazine, pimozone, prochlorperazine, thiothixene, and trifluoperazine.
2. Second-generation antipsychotics included aripiprazole, asenapine, cariprazine, clozapine, iloperidone, lurasidone, olanzapine, paliperidone, quetiapine, risperidone, and ziprasidone.
3. Rate ratios were calculated using negative binomial models with person-months at risk as the offset. Models were adjusted for state-level confounders including percent non-Hispanic Black, non-Hispanic Asian, and Hispanic; percent unemployed and percent renting their home; median income; and the overall claims rate. We included fixed effects for state, year, and calendar month to address spatial and temporal autocorrelation.
4. 95% CI were calculated with robust standard errors to account for repeated observations within states over time.

**eTable 12.** Sensitivity Analyses With Total Diagnoses and Prescriptions as Offsets

|                                        | <b>Diagnoses</b> <sup>1</sup>             | <b>Prescriptions</b> <sup>2</sup>         |
|----------------------------------------|-------------------------------------------|-------------------------------------------|
|                                        | <b>Rate Ratio (95% CI)</b> <sup>3,4</sup> | <b>Rate Ratio (95% CI)</b> <sup>3,4</sup> |
| <b>No policy</b>                       | (Ref)                                     | (Ref)                                     |
| <b>Medical, no retail outlets</b>      | 1.11 (0.97 – 1.28)                        | 0.98 (0.89 – 1.07)                        |
| <b>Medical, retail outlets</b>         | 1.21 (0.97 – 1.50)                        | 0.95 (0.85 – 1.06)                        |
| <b>Recreational, no retail outlets</b> | 1.39 (1.00 – 1.95)                        | 0.98 (0.79 – 1.22)                        |
| <b>Recreational, retail outlets</b>    | 1.64 (1.16 – 2.31)                        | 0.92 (0.79 – 1.07)                        |

1. Diagnoses for all medical conditions for each state-month were summed and specified as the offset.
2. All filled prescriptions for each state-month were summed and specified as the offset.
3. Rate ratios were calculated using negative binomial models. Models were adjusted for state-level confounders including percent non-Hispanic Black, non-Hispanic Asian, and Hispanic; percent unemployed and percent renting their home; median income; and the overall claims rate. We included fixed effects for state, year, and calendar month to address spatial and temporal autocorrelation.
5. 95% CI were calculated with robust standard errors to account for repeated observations within states over time.

**eTable 13.** Sensitivity Analysis With Simplified 3-Category Exposure

|                     | <b>Diagnoses</b>                         | <b>Prescriptions</b>                     |
|---------------------|------------------------------------------|------------------------------------------|
|                     | <b>Rate Ratio (95% CI)<sup>1,2</sup></b> | <b>Rate Ratio (95% CI)<sup>1,2</sup></b> |
| <b>No policy</b>    | (Ref)                                    | (Ref)                                    |
| <b>Medical</b>      | 1.17 (0.96 – 1.42)                       | 1.00 (0.89 – 1.14)                       |
| <b>Recreational</b> | 1.33 (0.98 – 1.82)                       | 1.13 (0.89 – 1.42)                       |

1. Rate ratios were calculated using negative binomial models with person-months at risk as the offset. Models were adjusted for state-level confounders including percent non-Hispanic Black, non-Hispanic Asian, and Hispanic; percent unemployed and percent renting their home; median income; and the overall claims rate. We included fixed effects for state, year, and calendar month to address spatial and temporal autocorrelation.
2. 95% CI were calculated with robust standard errors to account for repeated observations within states over time.

**eTable 14.** Sensitivity Analysis With Recreational Policies With 6-Category Exposure

|                                                      | <b>Diagnoses</b>                         | <b>Prescriptions</b>                     |
|------------------------------------------------------|------------------------------------------|------------------------------------------|
|                                                      | <b>Rate Ratio (95% CI)<sup>1,2</sup></b> | <b>Rate Ratio (95% CI)<sup>1,2</sup></b> |
| <b>No policy</b>                                     | (Ref)                                    | (Ref)                                    |
| <b>Medical, no retail outlets</b>                    | 1.13 (0.94 – 1.35)                       | 1.00 (0.88 – 1.13)                       |
| <b>Medical, retail outlets</b>                       | 1.25 (0.96 – 1.62)                       | 1.02 (0.87 – 1.19)                       |
| <b>Recreational, no retail outlets</b>               | 1.39 (0.94 – 2.06)                       | 1.13 (0.85 – 1.51)                       |
| <b>Recreational, retail outlets, restrictions</b>    | 1.61 (1.17 – 2.21)                       | 1.19 (0.91 – 1.55)                       |
| <b>Recreational, retail outlets, no restrictions</b> | 0.91 (0.65 – 1.26)                       | 1.02 (0.78 – 1.34)                       |

1. Six-category version of the exposure variable separates states with recreational policies that allow retail outlets into those with and without THC dose-related restrictions defined as THC dose per serving size, THC content per package, or product types (e.g., bans on edible products)
2. Rate ratios were calculated using negative binomial models with person-months at risk as the offset. Models were adjusted for state-level confounders including percent non-Hispanic Black, non-Hispanic Asian, and Hispanic; percent unemployed and percent renting their home; median income; and the overall claims rate. We included fixed effects for state, year, and calendar month to address spatial and temporal autocorrelation.
3. 95% CI were calculated with robust standard errors to account for repeated observations within states over time.

**eTable 15.** Sensitivity Analysis Restricted to State-Months With Policy in Place

|                                        | <b>Diagnoses</b>                         | <b>Prescriptions</b>                     |
|----------------------------------------|------------------------------------------|------------------------------------------|
|                                        | <b>Rate Ratio (95% CI)<sup>1,2</sup></b> | <b>Rate Ratio (95% CI)<sup>1,2</sup></b> |
| <b>Medical, no retail outlets</b>      | (Ref)                                    | (Ref)                                    |
| <b>Medical, retail outlets</b>         | 1.11 (0.94 – 1.31)                       | 1.06 (0.95 – 1.19)                       |
| <b>Recreational, no retail outlets</b> | 1.41 (1.00 – 1.99)                       | 1.28 (1.04 – 1.59)                       |
| <b>Recreational, retail outlets</b>    | 1.29 (0.96 – 1.72)                       | 1.19 (0.98 – 1.45)                       |

1. Rate ratios were calculated using negative binomial models with person-months at risk as the offset. Models were adjusted for state-level confounders including percent non-Hispanic Black, non-Hispanic Asian, and Hispanic; percent unemployed and percent renting their home; median income; and the overall claims rate. We included fixed effects for state, year, and calendar month to address spatial and temporal autocorrelation.
2. 95% CI were calculated with robust standard errors to account for repeated observations within states over time.



**eTable 16.** Negative Outcome Controls—All Diagnoses and All Prescriptions

|                                        | <b>Diagnoses</b> <sup>1</sup>             | <b>Prescriptions</b> <sup>2</sup>         |
|----------------------------------------|-------------------------------------------|-------------------------------------------|
|                                        | <b>Rate Ratio (95% CI)</b> <sup>3,4</sup> | <b>Rate Ratio (95% CI)</b> <sup>3,4</sup> |
| <b>No policy</b>                       | (Ref)                                     | (Ref)                                     |
| <b>Medical, no retail outlets</b>      | 1.01 (0.94 – 1.08)                        | 1.01 (0.93 – 1.11)                        |
| <b>Medical, retail outlets</b>         | 0.96 (0.87 – 1.06)                        | 1.04 (0.92 – 1.18)                        |
| <b>Recreational, no retail outlets</b> | 0.89 (0.77 – 1.03)                        | 1.13 (0.95 – 1.34)                        |
| <b>Recreational, retail outlets</b>    | 0.75 (0.65 – 0.87)                        | 1.26 (1.00 – 1.60)                        |

1. Diagnoses for all medical condition were specified as the outcome of interest.
2. All filled prescriptions were specified as the outcome of interest.
3. Rate ratios were calculated using negative binomial models with person-months at risk as the offset. Models were adjusted for state-level confounders including percent non-Hispanic Black, non-Hispanic Asian, and Hispanic; percent unemployed and percent renting their home; median income; and the overall claims rate. We included fixed effects for state, year, and calendar month to address spatial and temporal autocorrelation.
4. 95% CI were calculated with robust standard errors to account for repeated observations within states over time.

**eTable 17.** Negative Exposure Control—Hypothetical Law Change

|                                        | <b>Diagnoses</b>                         | <b>Prescriptions</b>                     |
|----------------------------------------|------------------------------------------|------------------------------------------|
|                                        | <b>Rate Ratio (95% CI)<sup>3,4</sup></b> | <b>Rate Ratio (95% CI)<sup>3,4</sup></b> |
| <b>No policy</b>                       | (Ref)                                    | (Ref)                                    |
| <b>Medical, no retail outlets</b>      | 1.00 (0.98 – 1.02)                       | 1.00 (0.98 – 1.01)                       |
| <b>Medical, retail outlets</b>         | 1.00 (0.98 – 1.02)                       | 1.00 (0.98 – 1.01)                       |
| <b>Recreational, no retail outlets</b> | 1.00 (0.95 – 1.05)                       | 1.01 (0.97 – 1.04)                       |
| <b>Recreational, retail outlets</b>    | 0.97 (0.92 – 1.03)                       | 1.00 (0.96 – 1.03)                       |

1. State cannabis policy levels were randomly re-assigned at the state-month to create a permutation of observed policy changes that served as the negative exposure control for this analysis.
2. Rate ratios were calculated using negative binomial models with person-months at risk as the offset. Models were adjusted for state-level confounders including percent non-Hispanic Black, non-Hispanic Asian, and Hispanic; percent unemployed and percent renting their home; median income; and the overall claims rate. We included fixed effects for state, year, and calendar month to address spatial and temporal autocorrelation.
3. 95% CI were calculated with robust standard errors to account for repeated observations within states over time.

**eTable 18.** Negative Exposure Control—Naloxone Overdose Prevention Laws

|                                | <b>Diagnoses</b>                         | <b>Prescriptions</b>                     |
|--------------------------------|------------------------------------------|------------------------------------------|
|                                | <b>Rate Ratio (95% CI)<sup>1,2</sup></b> | <b>Rate Ratio (95% CI)<sup>1,2</sup></b> |
| <b>No law</b>                  | (Ref)                                    | (Ref)                                    |
| <b>Overdose prevention law</b> | 1.13 (1.02 – 1.25)                       | 1.15 (1.06 – 1.25)                       |

1. Rate ratios were calculated using negative binomial models with person-months at risk as the offset. Models were adjusted for state-level confounders including percent non-Hispanic Black, non-Hispanic Asian, and Hispanic; percent unemployed and percent renting their home; median income; and the overall claims rate. We included fixed effects for state, year, and calendar month to address spatial and temporal autocorrelation.
2. 95% CI were calculated with robust standard errors to account for repeated observations within states over time.

**eTable 19.** Estimated Average Effect of Treatment on Treated (ATT) Comparing Sequential Levels of State Cannabis Policies Using Methods Proposed by Callaway and Sant’Anna, 2003 to 2017 <sup>1</sup>

|                                                                         | <b>DIAGNOSES <sup>2</sup></b><br>ATT (95% CI) | <b>PRESCRIPTIONS <sup>3</sup></b><br>ATT (95% CI) |
|-------------------------------------------------------------------------|-----------------------------------------------|---------------------------------------------------|
| <b>Medical, no retail outlets vs. no policy</b>                         | - 3.64 (-16.80, 9.53)                         | - 7.24 (-23.51, 9.03)                             |
| <b>Medical, retail outlets vs. Medical, no retail outlets</b>           | 41.47 (-39.20, 122.15)                        | 69.65 (-57.85, 197.16)                            |
| <b>Recreational, no retail outlets vs. Medical, retail outlets</b>      | - 0.44 (-14.58, 13.70)                        | 16.18 (-10.22, 42.58)                             |
| <b>Recreational, retail outlets vs. Recreational, no retail outlets</b> | 5.00 (-8.15, 18.14)                           | 4.13 (-12.75, 21.01)                              |

1. Because the estimator is built for binary treatments, we estimate a series of contrasts for each sequential policy level, restricting each analysis to the state-months with only those two policy levels, and allowing for unbalanced panel data.
2. Includes all unique diagnoses for schizophrenia, schizophreniform, and schizoaffective disorders; substance-related psychosis, mood disorder with psychotic features, and other forms of psychosis for each policy type over the study period.
3. Includes all unique prescriptions for first- and second-generation antipsychotics for each policy type over the study period.
