# Supplementary material
Source: PubMed Central journal article supplement (PMC10187491)
Supplement: jamanetwopen-e2252689-s002.pdf [file jamanetwopen-e2252689-s002.pdf]

## **Data Sharing Statement**

Elser. State Cannabis Legalization and Psychosis-Related Health Care Utilization. *JAMA Netw Open*. Published January 25, 2023. doi:10.1001/jamanetworkopen.2022.52689

### **Data**

**Data available:** No
